# Supplementary material for: Dupilumab provides important clinical benefits to patients with atopic dermatitis who do not achieve clear or almost clear skin according to the Investigator's Global Assessment: a pooled analysis of data from two phase III trials
Source: PubMed Central journal article supplement — Br J Dermatol. 2019 Apr 11;181(1):80–7. doi: 10.1111/bjd.17791 (PMC6849829; doi:10.1111/bjd.17791), 2019-04-11
Supplement: BJD-181-80-s004.pdf [file BJD-181-80-s004.pdf]

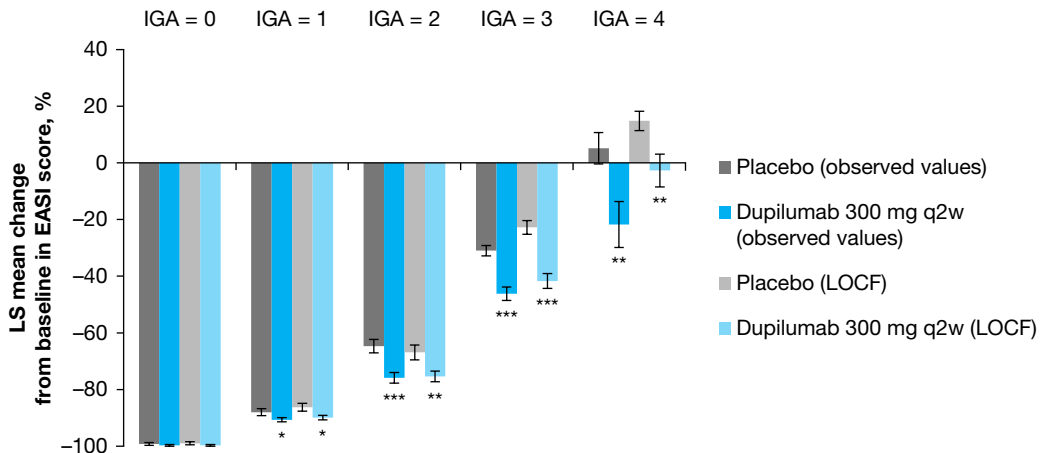

| IGA score at Week 16 | Placebo (observed values), n | Dupilumab 300 mg q2w (observed values), n | Placebo (LOCF), n | Dupilumab 300 mg q2w (LOCF), n |
|----------------------|------------------------------|-------------------------------------------|-------------------|--------------------------------|
| 0                    | 5                            | 26                                        | 4                 | 26                             |
| 1                    | 49                           | 152                                       | 43                | 145                            |
| 2                    | 72                           | 107                                       | 52                | 100                            |
| 3                    | 215                          | 131                                       | 174               | 132                            |
| 4                    | 83                           | 24                                        | 170               | 46                             |
