# Supplementary figures and images for: Dupilumab provides important clinical benefits to patients with atopic dermatitis who do not achieve clear or almost clear skin according to the Investigator's Global Assessment: a pooled analysis of data from two phase III trials
Source: PubMed Central journal article supplement — Br J Dermatol. 2019 Apr 11;181(1):80–7. doi: 10.1111/bjd.17791 (PMC6849829; doi:10.1111/bjd.17791), 2019-04-11

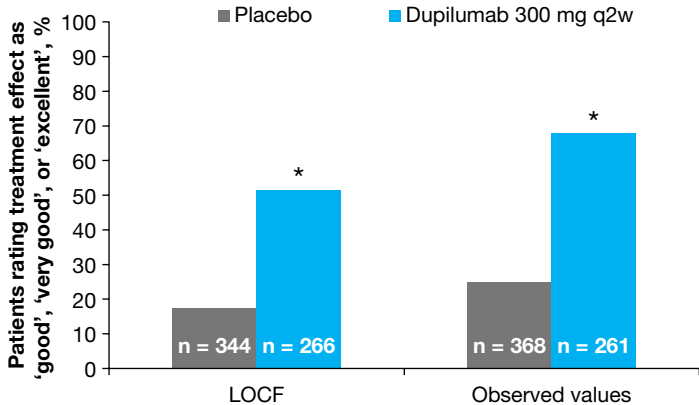

Supplement: BJD-181-80-s001.pdf [file BJD-181-80-s001.pdf]

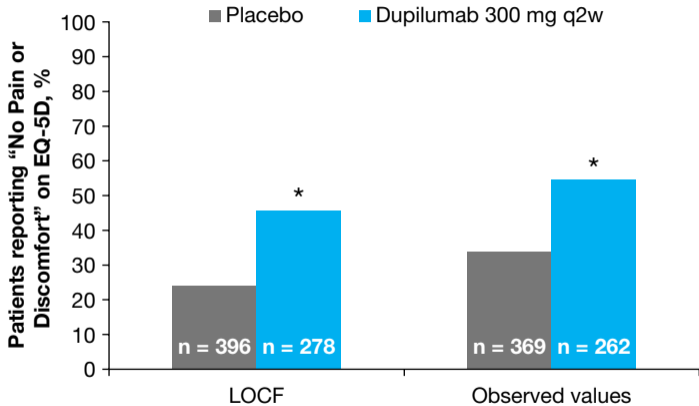

Supplement: BJD-181-80-s002.pdf [file BJD-181-80-s002.pdf]

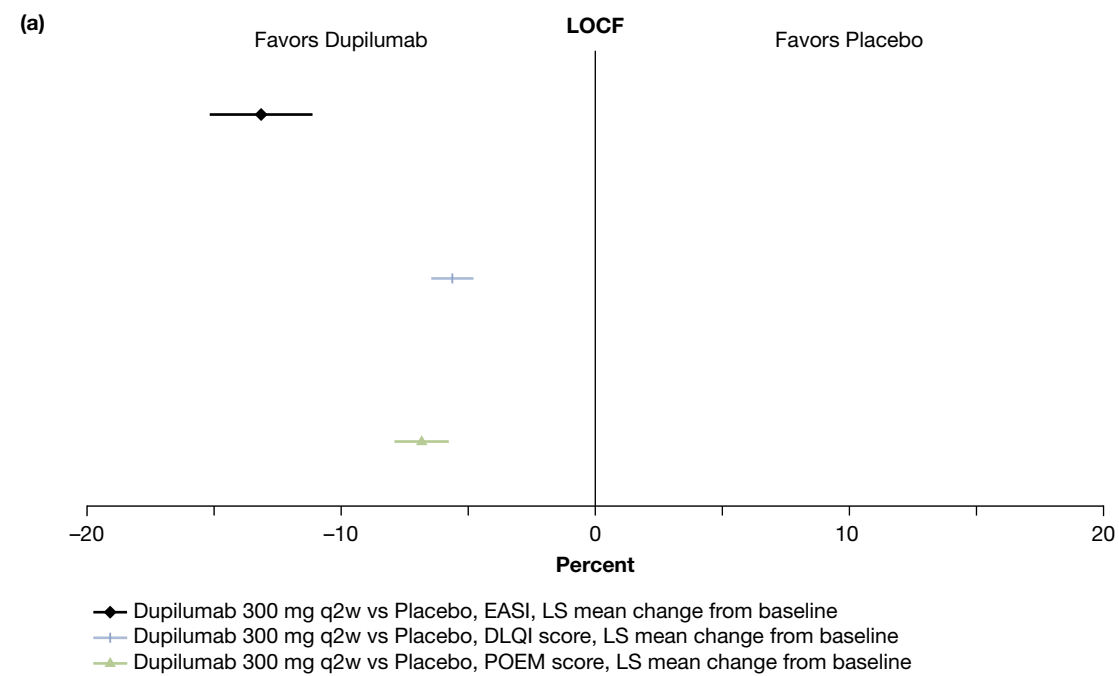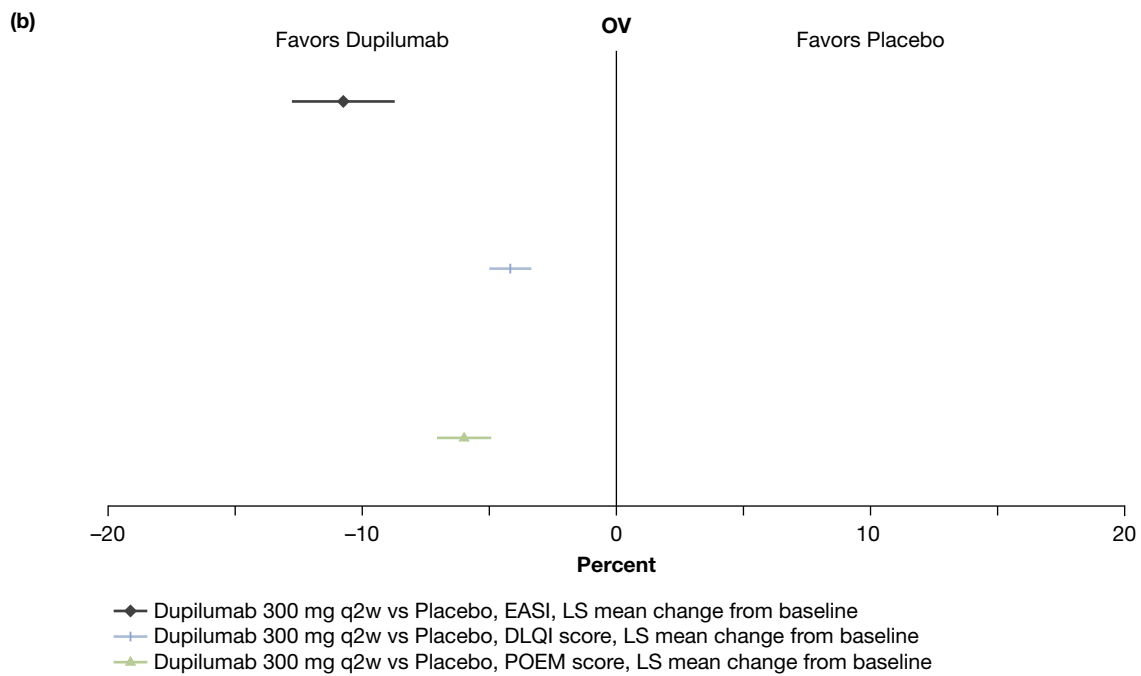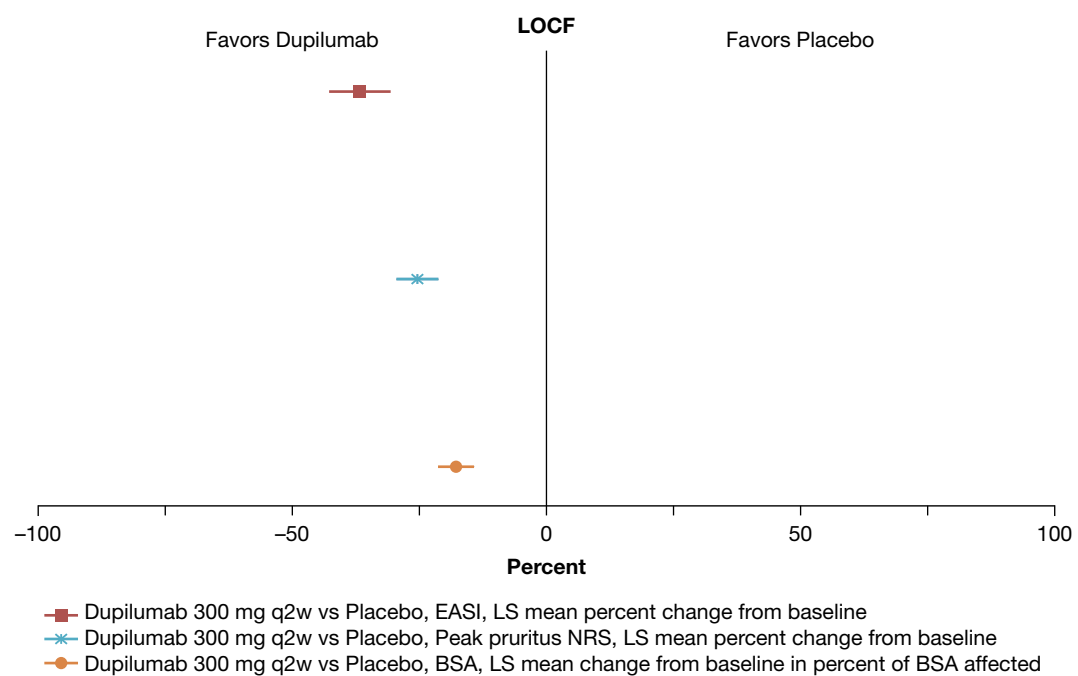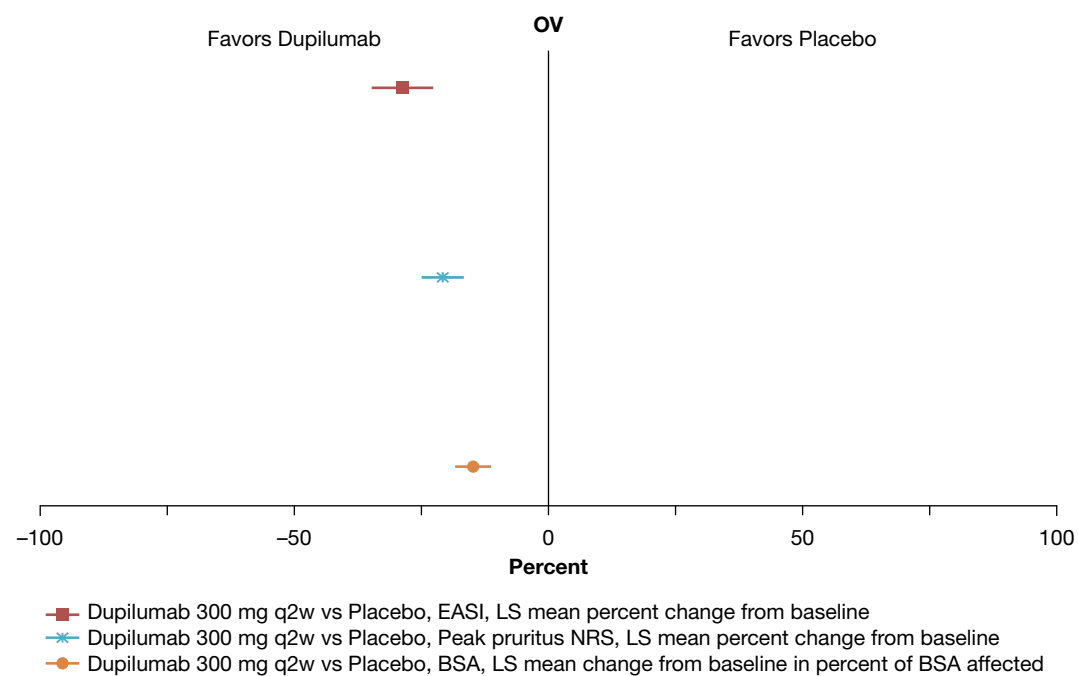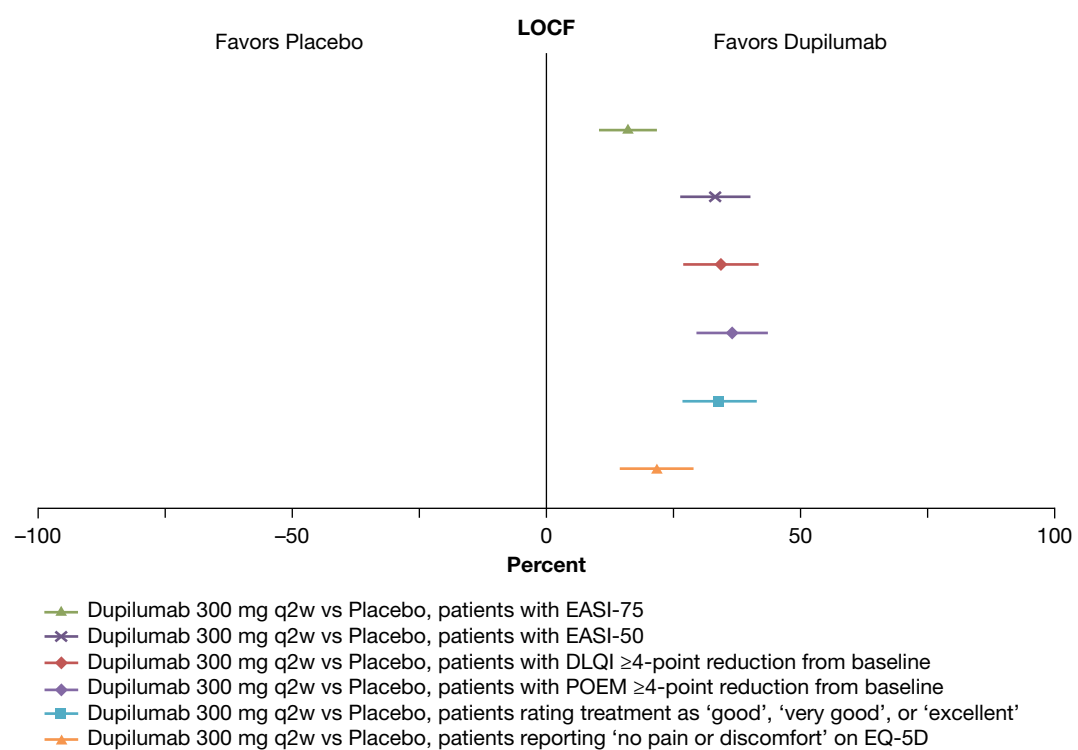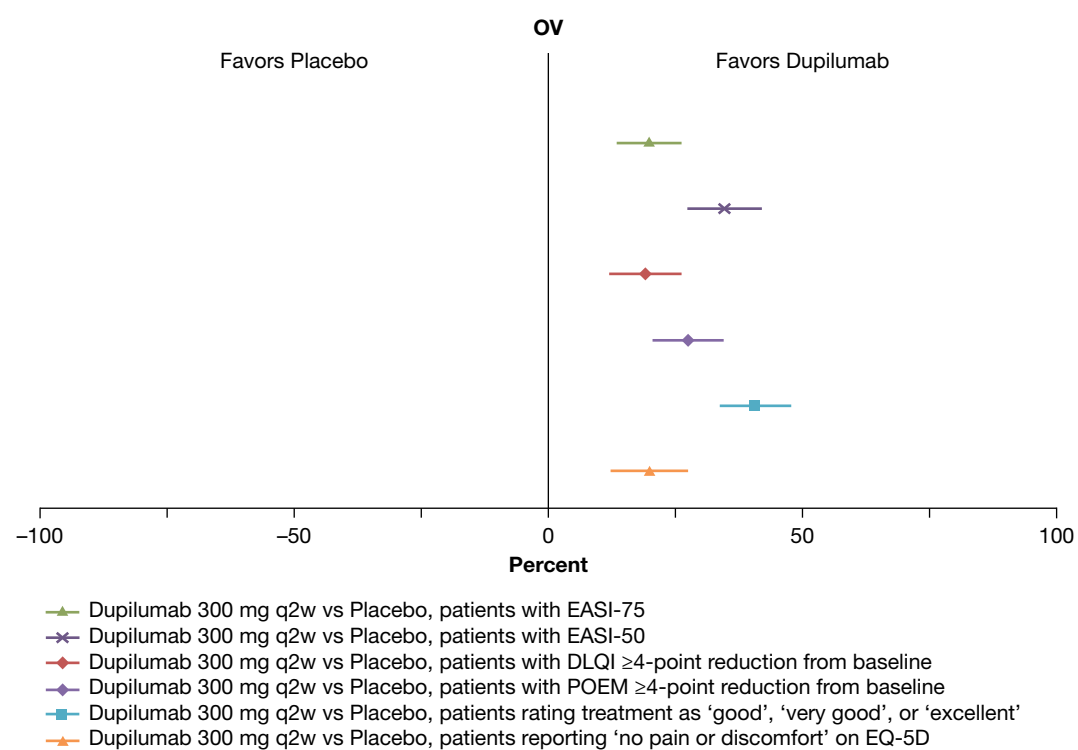

Supplement: BJD-181-80-s003.pdf [file BJD-181-80-s003.pdf]
